# Supplementary material for: The anti-cholesterolaemic effect of a consortium of probiotics: An acute study in C57BL/6J mice
Source: PubMed Central journal article supplement (PMC5460276; doi:10.1038/s41598-017-02889-5), 2017-06-06
Supplement: 41598_2017_2889_MOESM1_ESM.pdf [file 41598_2017_2889_MOESM1_ESM.pdf]

## The anti-cholesterolemic effect of a consortium of probiotics: An acute study in C57BL/6 mice.

D. R. Michael, T. S. Davies, J. W. E. Moss, D. Lama Calvente, D. P. Ramji, J. R. Marchesi, A. Pechlivanis, S. F. Plummer and T. R. Hughes.

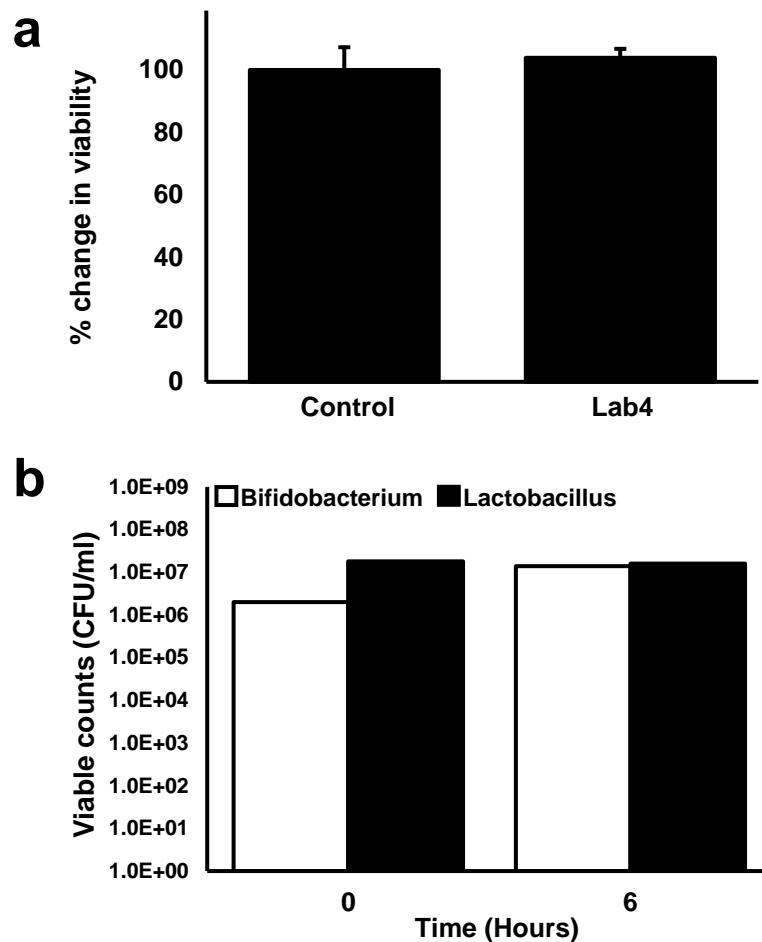

**Supplementary Figure S1: Caco-2 cell and bacterial viability under experimental conditions.** (a) 21 day polarized Caco-2 cells were treated with cholesterol (70  $\mu\text{g/ml}$ ; Control) or treated with cholesterol (70  $\mu\text{g/ml}$ ) and Lab4 ( $1 \times 10^8$  cfu/ml) for six hours (37°C, 5%  $\text{CO}_2$ ). Cell viability was assessed using crystal violet staining as described elsewhere<sup>1</sup> and is expressed as a percentage of the control that has been assigned as 100%. The data are presented as the mean  $\pm$  SD of triplicate samples from a single experiment. (b) Overnight cultures of Lab4 were adjusted to  $1 \times 10^8$  cfu/ml in supplemented antibiotic free DMEM and incubated with 21 day polarized Caco-2 cells and cholesterol (70  $\mu\text{g/ml}$ ) for six hours (37°C, 5%  $\text{CO}_2$ ). Viable numbers of lactobacillus and Bifidobacterium were enumerated at the start and end of the incubation period on MRS agar or MRS agar supplemented with cysteine, propionate and lithium chloride respectively. The data are present as cfu/ml and represent a single experiment.

|                                                        | PLASMA           |                  |                   | FAECES              |                     |                     |
|--------------------------------------------------------|------------------|------------------|-------------------|---------------------|---------------------|---------------------|
|                                                        | BL               | HFD              | HFD+P             | BL                  | HFD                 | HFD+P               |
| Ursocholic Acid                                        | ND               | ND               | ND                | 651.11±309.45       | 752.25±288.97       | 859.79±308.52       |
| 3-Ketocholic Acid                                      | ND               | ND               | ND                | 6218.40±1800.47     | 6978.47±3168.08     | 8647.75±4371.63     |
| Lithocholic acid                                       | ND               | ND               | ND                | 55686.70±6982.86    | 61941.92±18389.11   | 69574.73±25591.57   |
| Allolithocholic Acid                                   | ND               | ND               | ND                | 7760.32±5769.40     | 10683.85±5014.84    | 15342.52±8354.30    |
| Isolithocholic Acid                                    | ND               | ND               | ND                | 8319.61±2248.66     | 9205.53±4547.49     | 10142.26±4536.08    |
| 3,6/12-Diketocholic Acid                               | ND               | ND               | ND                | 6090.77±4295.23     | 5710.73±4857.41     | 9639.33±6317.06     |
| 3 $\alpha$ -Hydroxy-12 Ketolithocholic Acid            | ND               | ND               | ND                | 31961.08±12472.75   | 55636.22±19554.80   | 78913.29±27841.08   |
| Deoxycholic Acid/ chenodeoxycholic                     | ND               | ND               | ND                | 351927.23±133335.86 | 454251.81±59228.63  | 591466.30±99855.36  |
| 5 $\beta$ -Cholanic Acid-3 $\beta$ , 12 $\alpha$ -diol | ND               | ND               | ND                | 58092.39±18262.26   | 54859.71±13132.50   | 67977.99±21774.81   |
| Murocholic Acid                                        | ND               | ND               | ND                | 3551.89±1412.48     | 10914.88±6280.14    | 17170.64±9017.83    |
| Ursodeoxycholic acid                                   | ND               | ND               | ND                | 66705.48±24069.68   | 105585.77±7365.31   | 154035.97±23833.54  |
| Hyodeoxycholic acid                                    | ND               | ND               | ND                | 22028.25±6293.33    | 49789.98±20052.01   | 97425.51±41984.92   |
| 12 Dehydrocholic Acid                                  | 5982.90±7463.35  | 3524.03±1624.47  | 3526.31±4691.29   | 10743.12±3630.09    | 25932.87±11667.50   | 27736.26±13909.90   |
| $\omega$ Muricholic Acid                               | 9504.76±715596   | 8875.91±3049.83  | 5614.41±7306.10   | 141400.97±80335.97  | 263932.58±54767.14  | 314560.47±64585.18  |
| $\alpha/\beta$ Muricholic acid                         | 6614.09±6477.68  | 15970.27±6548.89 | 12854.28±16443.77 | 104229.53±25378.65  | 310467.25±124015.19 | 446102.24±134109.15 |
| Hyochoolic acid                                        | ND               | ND               | ND                | 1993.88±1504.40     | 2402.62±766.86      | 3325.34±858.03      |
| Cholic acid                                            | 10768.04±9751.40 | 16062.46±6774.92 | 14513.65±19584.86 | 4918.26±4337.96     | 83585.83±82149.69   | 92569.64±75383.67   |
| Taurochenodeoxycholic Acid                             | 205.31±126.62    | 1884.39±1866.13  | 895.85±623.29     | 1213.77±406.44      | 3635.21±1601.95     | 10196.65±6977.81    |
| Taurodeoxycholic Acid                                  | 1619.69±1268.99  | 1745.75±1420.30  | 1389.52±850.68    | 994.59±392.36       | 6086.81±4191.70     | 13678.11±13731.36   |
| Tauro-ursodeoxycholic Acid                             | 599.47±185.14    | 902.19±154.69    | 696.85±394.72     | 533.87±91.95        | 2073.17±1341.51     | 3336.03±2403.10     |
| Taurohyodeoxycholic Acid                               | ND               | ND               | ND                | 423.18±189.83       | 1154.92±634.43      | 3067.46±2310.00     |
| Taurocholic Acid                                       | 3139.05±1493.79  | 2748.90±2561.92  | 1571.36±1345.04   | 8124.67±1818.68     | 4898.07±1823.25     | 10453.98±8743.77    |
| Tauro- $\omega,\alpha,\beta$ Muricholic Acid           | 3182.83±1101.32  | 6324.24±4040.42  | 3319.21±1957.93   | 8889.43±1268.29     | 24002.12±15654.38   | 32360.63±23481.65   |

**Supplementary Table S1: Relative bile acid intensities in the plasma and faeces of BL, HFD and HFD+P mice gathered from UPLC-MS profiling.** Data is presented as the mean  $\pm$  SD from for 4 (plasma) or 6 (faeces) mice in each group. Faecal data is corrected to dry weight of stool.

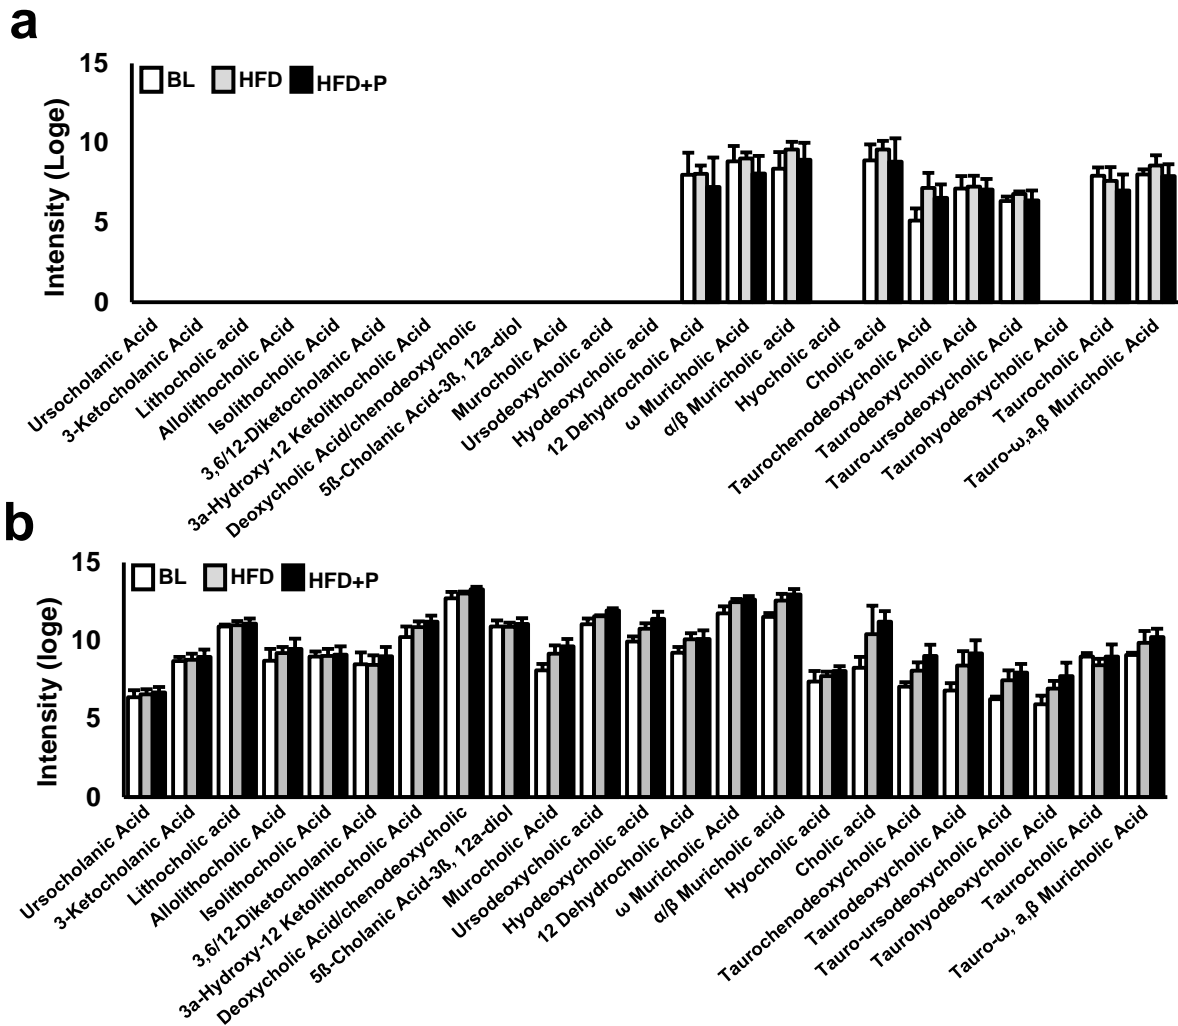

**Supplementary Figure S2: BA intensity profiles.** Relative intensities of (a) plasma and (b) faecal bile acid signatures gathered from UPLC-MS analysis are presented for BL, HFD and HFD+P mice. The data is represented as the mean of scaled ( $\log_e$ ) data  $\pm$  SD for 4 (plasma) or 6 (faeces) mice in each group.

| Gene             | Forward Primer (5' to 3') | Reverse Primer (5' to 3')      | Ref |
|------------------|---------------------------|--------------------------------|-----|
| mFXR             | TCCAGGGTTTCAGACACTGG      | GCCGAACGAAGAAACATGG            | 2   |
| mFGF15           | ACGTCCTTGATGGCAATCG       | GAGGACCAAAACGAACGAAATT         | 3   |
| mSHP             | CGATCCTCTCAACCCAGATG      | AGGGCTCCAAGACTTCACACA          | 3   |
| mCYP7A           | AACAACCTGCCAGTACTAGATAGC  | GTGTAGAGTGAAGTCCTCCTTAGC       | 4   |
| mNPC1L1          | GGCTCCATCTGGAGTAGCTG      | ATCGCACTACCATCCAGGAC           | 5   |
| mABCG-5          | CGTGGCGGACCAAATGATT       | CCACTGGAAATCCCCCAA             | 6   |
| mABCG-8          | GAGCTGCCCCGGGATGATA       | CGGAAGTCATTGGAAATCTG           | 7   |
| mABCA-1          | TGGAAAACAGTTAATGACCAGCCA  | TCCAGTAACAGCTGACATGTTTGT       |     |
| mHMGR            | AAGGGTACGGAGAAAGCACT      | AATGACGCTTCACAAACCA            | 8   |
| m $\beta$ -Actin | ACACCCGCCACCAGTTCGCCAT    | CACACCCTGGTGCCTAGGGCGGCCACGATG | 9   |

**Supplementary Table S2: Oligonucleotide primer sequences**

## Supplementary reference

- 1 Gorenjak, M. *et al.* Improvement of lipid profile by probiotic/protective cultures: study in a non-carcinogenic small intestinal cell model. *New Microbiol* **37**, 51-64 (2014).
- 2 Udayappan, S. *et al.* Oral treatment with *Eubacterium hallii* improves insulin sensitivity in db/db mice. *Npj Biofilms And Microbiomes* **2**, 16009, doi:10.1038/npjbiofilms.2016.9(2016).
- 3 Chen, M. L. *et al.* Resveratrol Attenuates Trimethylamine-N-Oxide (TMAO)-Induced Atherosclerosis by Regulating TMAO Synthesis and Bile Acid Metabolism via Remodeling of the Gut Microbiota. *MBio* **7**, e02210-02215, doi:10.1128/mBio.02210-15 (2016).
- 4 Kong, B. *et al.* Mechanism of tissue-specific farnesoid X receptor in suppressing the expression of genes in bile-acid synthesis in mice. *Hepatology* **56**, 1034-1043, doi:10.1002/hep.25740 (2012).
- 5 Catry, E. *et al.* Ezetimibe and simvastatin modulate gut microbiota and expression of genes related to cholesterol metabolism. *Life Sci* **132**, 77-84, doi:10.1016/j.lfs.2015.04.004 (2015).
- 6 Kawase, A., Hata, S., Takagi, M. & Iwaki, M. Pravastatin Modulate Niemann-Pick C1-Like 1 and ATP-Binding Cassette G5 and G8 to Influence Intestinal Cholesterol Absorption. *J Pharm Pharm Sci* **18**, 765-772 (2015).
- 7 Huang, Y. *et al.* *Lactobacillus acidophilus* ATCC 4356 prevents atherosclerosis via inhibition of intestinal cholesterol absorption in apolipoprotein E-knockout mice. *Appl Environ Microbiol* **80**, 7496-7504, doi:10.1128/AEM.02926-14 (2014).
- 8 Song, M. *et al.* Effect of *Lactobacillus acidophilus* NS1 on plasma cholesterol levels in diet-induced obese mice. *J Dairy Sci* **98**, 1492-1501, doi:10.3168/jds.2014-8586 (2015).
- 9 Moss, J. W. *et al.* A Unique Combination of Nutritionally Active Ingredients Can Prevent Several Key Processes Associated with Atherosclerosis In Vitro. *PLoS One* **11**, e0151057, doi:10.1371/journal.pone.0151057 (2016).
